# Supplementary material for: Metabolomic Profiling in Patients with Heart Failure and Exercise Intolerance: Kynurenine as a Potential Biomarker
Source: MDPI journal article supplement (doi:10.3390/cells11101674), 2022-05-18
Supplement: s1 [file s1]

**Metabolomic profiling in heart failure, exercise intolerance, and reduced muscle  
endurance: Kynurenine as a potential biomarker**

Tarek Bekfani MD<sup>1,2</sup>, Mohamed Bekhite PhD<sup>2</sup>, Sophie Neugebauer PhD<sup>3</sup>, Steffen Derlien PhD<sup>4</sup>, Ali Hamadanchi MD<sup>2</sup>, Jenny Nisser M.A.<sup>4</sup>, Marion S. Hilse MD<sup>2</sup>, Daniela Haase PhD<sup>2</sup>, Tom Kretzschmar<sup>2</sup>, Mei-Fang Wu PhD<sup>2</sup>, Michael Lichtenauer MD<sup>5</sup>, Michael Kiehntopf MD<sup>3</sup>, Stephan von Haehling MD, PhD<sup>6</sup>, Peter Schlattmann MD<sup>7</sup>, Gabriele Lehmann MD<sup>8</sup>, Marcus Franz MD<sup>2</sup>, Sven Möbius-Winkler MD<sup>2</sup>, P. Christian Schulze MD, PhD<sup>2</sup>

- 1 Department of Internal Medicine I, Division of Cardiology, Angiology and Intensive Medical Care, University Hospital Magdeburg, Otto von Guericke-University, Magdeburg, Germany
- 2 Department of Internal Medicine I, Division of Cardiology, Angiology and Intensive Medical Care, University Hospital Jena, Friedrich-Schiller-University, Jena, Germany
- 3 Department of Clinical Chemistry and Laboratory Diagnostics, Jena University Hospital, Jena, Germany
- 4 Institute of Physiotherapy, University Hospital Jena, Friedrich-Schiller-University, Jena, Germany
- 5 Clinic of Internal Medicine II, Department of Cardiology, Paracelsus Medical University of Salzburg, Austria
- 6 University of Göttingen Medical Center, Department of Cardiology and Pneumology, Göttingen, Germany and German Center for Cardiovascular Research (DZHK), partner site Göttingen, Germany
- 7 Institute for Medical Statistics, Computer Science and Data Science (IMSID), Jena University Hospital, Jena, Germany
- 8 Department of Internal Medicine III, Division of Endocrinology, Nephrology and Rheumatology, University Hospital Jena, Friedrich-Schiller-University, Jena, Germany

**Address for correspondence:**

P. Christian Schulze, MD; PhD  
Department of Internal Medicine I  
Division of Cardiology  
University Hospital Jena  
Am Klinikum 1, 07747 Jena  
Germany  
Tel.: +49 3641 932 4101  
Fax: +49 3641 932 4102  
E-Mail: [christian.schulze@med.uni-jena.de](mailto:christian.schulze@med.uni-jena.de)

## **SUPPLEMENTARY DATA**

**Table S1:** Concentration of amino acids and biogenic amines in serum in patients with HF and in HC.

|                                   | <b>HFpEF</b><br><b>N=17</b> | <b>HFrEF</b><br><b>N=18</b> | <b>HC</b><br><b>N=20</b> | <b>p-value</b> |
|-----------------------------------|-----------------------------|-----------------------------|--------------------------|----------------|
| <b>Alanine</b> (μM)               | 430±174                     | 462±162                     | 549±98                   | 0.043          |
| <b>Asparagine</b> (μM)            | 47.40 [42.10-59.30]         | 49.70 [41.30-55.77]         | 52.0 [48.0-78.55]        | 0.08           |
| <b>Glutamate</b> (μM)             | 55.0 [51.05-81.30]*         | 66.50 [50.0-83.63] †        | 158 [144-204]            | <0.001         |
| <b>Glycine</b> (μM)               | 208 [149-288]*              | 206 [110-249] †             | 405 [281-537]            | 0.001          |
| <b>Ornithine</b> (μM)             | 113 [93.40-123]*            | 111 [87.8-141] †            | 166 [134-190]            | 0.001          |
| <b>Phenylalanine</b><br>(μM)      | 73±9                        | 81±12 †                     | 65±12                    | <0.001         |
| <b>Tryptophan</b> (μM)            | 66±15                       | 72±12                       | 79±17                    | 0.047          |
| <b>Valine</b> (μM)                | 295±93*                     | 308±72 †                    | 193±59                   | <0.001         |
| <b>Essential amino acids</b> (μM) | 140±37.2                    | 143±29.5                    | 125±29.5                 | 0.19           |
| <b>Kynurenine</b> (μM)            | 3.7±0.9*                    | 4.7±1.7 †                   | 1.6±0.9                  | < 0.001        |

\*: p<0.0167 in comparison between HFpEF and HC.

†: p<0.0167 in comparison between HFrEF and HC.

HC: healthy controls, HFpEF: Heart failure with preserved ejection fraction, HFrEF: Heart failure with reduced ejection fraction,

**Table S2:** Concentration of ACs in serum in patients with HF and in HC.

|                                 | <b>HFpEF</b>        | <b>HFrEF</b>          | <b>HC</b>           | <b>p-Value</b> |
|---------------------------------|---------------------|-----------------------|---------------------|----------------|
| <b>C0</b> (μM)                  | 36.50 [31.0-40.40]* | 40.60 [35.58-44.78] † | 28.40 [25.40-34.35] | <0.001         |
| <b>Short-chain ACs</b><br>(μM)  | 0.19 [0.07-0.30]    | 0.24 [0.10-0.39]      | 0.24 [0.20-0.31]    | 0.26           |
| <b>Medium-chain ACs</b><br>(μM) | 0.38 [0.14-1.47]*   | 0.32 [0.14-1.64] †    | 0.12 [0.10-0.13]    | <0.001         |
| <b>Long-chain ACs</b><br>(μM)   | 0.06 [0.05-0.06]*   | 0.06 [0.05-0.08] †    | 0.04 [0.03-0.05]    | <0.001         |
| <b>Unsaturated ACs</b><br>(μM)  | 0.08 [0.06-0.10]*   | 0.10 [0.05-0.12] †    | 0.05 [0.05-0.06]    | <0.001         |
| <b>C10</b> (μM)                 | 0.96 [0.27-7.21]*   | 0.67 [0.29-8.07] †    | 0.23 [0.18-0.28]    | 0.001          |
| <b>C10:1</b> (μM)               | 0.26 [0.15-0.36]*   | 0.28 [0.12-0.47] †    | 0.13 [0.09-0.16]    | 0.003          |
| <b>C12:1</b> (μM)               | 0.15 [0.12-0.20]*   | 0.16 [0.13-0.27] †    | 0.11 [0.09-0.13]    | <0.001         |
| <b>C14:1</b> (μM)               | 0.12 [0.07-0.16]*   | 0.13 [0.07-0.19] †    | 0.07 [0.06-0.09]    | 0.001          |
| <b>C14:1-(OH)</b> (μM)          | 0.02 [0.01-0.03]*   | 0.03 [0.02-0.04] †    | 0.01 [0.01-0.02]    | <0.001         |
| <b>C14:2-(OH)</b> (μM)          | 0.02 [0.01-0.02]    | 0.02 [0.01-0.03] †    | 0.01 [0.01-0.01]    | 0.016          |
| <b>C16:1</b> (μM)               | 0.04 [0.03-0.05]    | 0.05 [0.04-0.07] †    | 0.03 [0.03-0.04]    | 0.005          |
| <b>C16:1-(OH)</b> (μM)          | 0.02 [0.01-0.02]*   | 0.02 [0.01-0.02]      | 0.01 [0.01-0.01]    | 0.007          |
| <b>C16:2</b> (μM)               | 0.02 [0.02-0.03]*   | 0.02 [0.01-0.04]      | 0.01 [0.01-0.02]    | 0.025          |
| <b>C16:2-(OH)</b> (μM)          | 0.02 [0.01-0.13]*   | 0.02 [0.01-0.16] †    | 0.01 [0.01-0.02]    | 0.001          |
| <b>C18:1</b> (μM)               | 0.19 [0.14-0.20]*   | 0.20 [0.13-0.27] †    | 0.12 [0.09-0.16]    | 0.004          |
| <b>C18:1-(OH)</b> (μM)          | 0.03 [0.02-0.13]*   | 0.04 [0.03-0.16] †    | 0.02 [0.02-0.03]    | <0.001         |
| <b>C5-M-DC</b> (μM)             | 0.07 [0.02-0.12]*   | 0.05 [0.02-0.12] †    | 0.02 [0.02-0.03]    | <0.001         |
| <b>C6:1</b> (μM)                | 0.03 [0.01-0.07]    | 0.03 [0.02-0.06] †    | 0.02 [0.01-0.02]    | 0.021          |

\*: p<0.0167 in comparison between HFpEF and HC. †: p<0.0167 in comparison between HFrEF and HC.

AC = acylcarnitine. Cx:y: where x is the number of carbons in the fatty acid side chain; y is the number of double bonds in the fatty acid side chain; DC: decarboxyl; M: methyl; ns: not significant; OH: hydroxyl, HC: healthy controls, HFpEF: Heart failure with preserved ejection fraction, HFrEF: Heart failure with reduced ejection fraction,

**Table S3:** Concentration of PCs and Lyso-PCs in serum in patients with HF and in HC.

|                           | <b>HFpEF</b>      | <b>HFrEF</b>                  | <b>HC</b>        | <b>p-value</b> |
|---------------------------|-------------------|-------------------------------|------------------|----------------|
| <b>PC aa C32:0 (μM)</b>   | 11.9±2.9*         | 13.9±3.7                      | 15.3±3.2         | 0.009          |
| <b>PC aa C32:3 (μM)</b>   | 0.4±0.1*          | 0.4±0.2 <sup>†</sup>          | 0.7±0.2          | <0.0001        |
| <b>PC aa C34:2 (μM)</b>   | 376±107*          | 425±182 <sup>†</sup>          | 666±101          | <0.0001        |
| <b>PC aa C34:3 (μM)</b>   | 15.4±4.9*         | 16.7±8.1 <sup>†</sup>         | 25.7±9.9         | <0.0001        |
| <b>PC aa C36:0 (μM)</b>   | 2.4±0.8*          | 2.6±1.3 <sup>†</sup>          | 3.9±1.0          | <0.0001        |
| <b>PC aa C36:1 (μM)</b>   | 38.0±19.1*        | 34.2±8.9                      | 24.0±7.9         | 0.004          |
| <b>PC aa C36:2 (μM)</b>   | 218.8±42.1*       | 223.8±74.0 <sup>†</sup>       | 308.8±55.8       | <0.0001        |
| <b>PC aa C36:3 (μM)</b>   | 122.2±28.9*       | 132.3±44.8 <sup>†</sup>       | 175.7±28.7       | <0.0001        |
| <b>PC aa C36:4 (μM)</b>   | 171.8±39.6*       | 188.4±58.8 <sup>†</sup>       | 239.8±36.8       | <0.0001        |
| <b>PC aa C36:6 (μM)</b>   | 0.9±0.3           | 0.9±0.3                       | 1.3±0.6          | 0.04           |
| <b>PC aa C38:0 (μM)</b>   | 2.2±0.5           | 2.3±0.8                       | 2.8±1.0          | 0.04           |
| <b>PC aa C40:2 (μM)</b>   | 0.20 [0.18-0.27]* | 0.23 [0.18-0.35]              | 0.32 [0.22-0.36] | 0.007          |
| <b>PC aa C40:3 (μM)</b>   | 0.50 [0.39-0.56]* | 0.51 [0.37-0.66] <sup>†</sup> | 0.64 [0.60-0.90] | 0.001          |
| <b>PC aa C42:4 (μM)</b>   | 0.08±0.05*        | 0.07±0.04                     | 0.04±0.03        | 0.002          |
| <b>PC aa C42:5 (μM)</b>   | 0.3±0.1*          | 0.4±0.2                       | 0.5±0.2          | 0.01           |
| <b>LysoPC a 16:0 (μM)</b> | 82.5±16.8*        | 87.8±31.8                     | 109.4±25.2       | 0.005          |
| <b>LysoPC a 17:0 (μM)</b> | 1.7±0.4           | 1.6±0.6                       | 2.0±0.5          | 0.04           |
| <b>LysoPC a 18:0 (μM)</b> | 23.4±3.9          | 22.2±7.0                      | 27.4±5.7         | 0.02           |

|                           |           |                       |           |         |
|---------------------------|-----------|-----------------------|-----------|---------|
| <b>LysoPC a 26:0 (μM)</b> | 0.09±0.05 | 0.08±0.04             | 0.06±0.03 | 0.02    |
| <b>PC ae C32:1 (μM)</b>   | 2.3±0.5*  | 2.4±0.7 <sup>†</sup>  | 3.1±0.9   | 0.001   |
| <b>PC ae C34:1 (μM)</b>   | 8.0±2.0   | 8.5±2.9               | 10.2±2.3  | <0.02   |
| <b>PC ae C34:2 (μM)</b>   | 9.0±1.7*  | 8.7±2.9 <sup>†</sup>  | 11.9±2.5  | <0.0001 |
| <b>PC ae C34:3 (μM)</b>   | 5.3±1.2*  | 4.9±1.3 <sup>†</sup>  | 7.7±2.2   | <0.0001 |
| <b>PC ae C36:0 (μM)</b>   | 0.8±0.3*  | 0.9±0.4               | 1.2±0.3   | 0.002   |
| <b>PC ae C36:2 (μM)</b>   | 11.2±2.6* | 11.1±3.2 <sup>†</sup> | 14.4±2.7  | 0.001   |
| <b>PC ae C36:3 (μM)</b>   | 5.5±1.2   | 5.4±1.6 <sup>†</sup>  | 6.8±1.3   | 0.004   |
| <b>PC ae C36:5 (μM)</b>   | 8.9±2.2*  | 9.6±2.9               | 11.6±2.9  | 0.008   |
| <b>PC ae C38:0 (μM)</b>   | 1.7±0.5   | 1.7±0.5               | 2.3±0.8   | 0.008   |
| <b>PC ae C38:3 (μM)</b>   | 3.2±0.8   | 3.3±1.1               | 4.0±0.8   | 0.02    |
| <b>PC ae C40:1 (μM)</b>   | 0.9±0.3*  | 0.9±0.2 <sup>†</sup>  | 1.3±0.4   | 0.002   |
| <b>PC ae C40:3 (μM)</b>   | 0.6±0.2   | 0.6±0.2 <sup>†</sup>  | 0.8±0.2   | 0.006   |
| <b>PC ae C40:4 (μM)</b>   | 1.5±0.4*  | 1.6±0.5 <sup>†</sup>  | 2.1±0.5   | 0.002   |
| <b>PC ae C40:5 (μM)</b>   | 2.6±0.6*  | 2.9±1.0               | 3.6±0.7   | 0.001   |
| <b>PC ae C40:6 (μM)</b>   | 3.7±0.7   | 4.0±1.4               | 4.8±1.4   | 0.02    |
| <b>PC ae C42:0 (μM)</b>   | 0.6±0.1   | 0.6±0.2               | 0.7±0.1   | <0.05   |
| <b>PC ae C42:1 (μM)</b>   | 0.2±0.1*  | 0.2±0.1               | 0.3±0.1   | 0.005   |
| <b>PC ae C42:3 (μM)</b>   | 0.5±0.1   | 0.5±0.1 <sup>†</sup>  | 0.6±0.1   | 0.003   |

|                         |                      |                      |         |         |
|-------------------------|----------------------|----------------------|---------|---------|
| <b>PC ae C42:4 (μM)</b> | 0.6±0.2              | 0.5±0.2 <sup>†</sup> | 0.7±0.2 | 0.002   |
| <b>PC ae C42:5 (μM)</b> | 1.6±0.2 <sup>*</sup> | 1.7±0.3 <sup>†</sup> | 1.9±0.3 | <0.0001 |

\*: p<0.0167 in comparison between HFpEF and HC. †: p<0.0167 in comparison between HFrEF and HC.

a = acyl, aa = diacyl, ae =acyl-alkyl, Cx:y = where x is the number of carbons in the fatty acid side chain; y is the number of double bonds in the fatty acid side chain, OH =hydroxyl, LysoPC: Lysophosphatidylcholines,

PC = phosphatidylcholine.

**Table S4:** Concentrations of SMs in patients with HF and in HC.

|                           | <b>HFpEF</b>      | <b>HFrEF</b>           | <b>HC</b>        | <b>p-value</b> |
|---------------------------|-------------------|------------------------|------------------|----------------|
| <b>SM (OH) C14:1 (μM)</b> | 8.5±3.0           | 9.1±4.8                | 11.7±3.4         | 0.03           |
| <b>SM (OH) C22:1 (μM)</b> | 10.5±3.2          | 10.3±2.2               | 12.4±2.1         | 0.02           |
| <b>SM C16:0 (μM)</b>      | 122±29*           | 129±40 <sup>†</sup>    | 166±27           | <0.0001        |
| <b>SM C16:1 (μM)</b>      | 18.6±5.0*         | 18.9±5.9 <sup>†</sup>  | 24.6±3.9         | 0.001          |
| <b>SM C20:2 (μM)</b>      | 0.41±0.12*        | 0.38±0.21 <sup>†</sup> | 0.66±0.17        | <0.0001        |
| <b>SM C24:0 (μM)</b>      | 17.0±4.5*         | 17.2±4.6 <sup>†</sup>  | 22.2±3.4         | <0.0001        |
| <b>SM C24:1 (μM)</b>      | 54.0±11.3*        | 56.3±12.5 <sup>†</sup> | 67.3±10.0        | 0.001          |
| <b>SM C26:0 (μM)</b>      | 0.11 [0.08-0.15]* | 0.11 [0.08-0.15]       | 0.14 [0.11-0.22] | 0.04           |

\*: p<0.0167 in comparison between HFpEF and HC.

<sup>†</sup>: p<0.0167 in comparison between HFrEF and HC.

Cx:y = where x is the number of carbons in the fatty acid side chain; y is the number of double bonds in the fatty acid side chain, OH =hydroxyl, SM: sphingomyelin, HC: healthy controls, HFpEF: Heart failure with preserved ejection fraction, HFrEF: Heart failure with reduced ejection fraction.
